# Supplementary material
Source: HighWire-hosted journal article supplement (https://www.cmajopen.ca/highwire/filestream/81311/field_highwire_adjunct_files/0/2019-0003-1-at.pdf)

## Appendix 1 (as supplied by the authors): Supplementary material

### Diagnostic codes for exclusions and covariates

**Supplementary Table S1.** Cancer diagnostic codes for exclusions

| Description                                                                                           | ICD codes |
|-------------------------------------------------------------------------------------------------------|-----------|
| <b>ICD-9 codes:</b>                                                                                   |           |
| Malignant neoplasm of lip, oral cavity, and pharynx                                                   | 140–149   |
| Malignant neoplasm of digestive organs and peritoneum                                                 | 150-159   |
| Malignant neoplasm of respiratory and intrathoracic organs                                            | 160-165   |
| Malignant neoplasm of bone, connective tissue, skin, and breast                                       | 170-175   |
| Kaposi's sarcoma                                                                                      | 176       |
| Malignant neoplasm of genitourinary organs                                                            | 179-189   |
| Malignant neoplasm of other and unspecified sites                                                     | 190-199   |
| Malignant neoplasm of lymphatic and hematopoietic tissue                                              | 200-208   |
| Neuroendocrine tumors                                                                                 | 209       |
| <b>ICD-10 codes:</b>                                                                                  |           |
| Malignant neoplasms of lip, oral cavity and pharynx                                                   | C00-C14   |
| Malignant neoplasms of digestive organs                                                               | C15-C26   |
| Malignant neoplasms of respiratory and intrathoracic organs                                           | C30-C39   |
| Malignant neoplasms of bone and articular cartilage                                                   | C40-C41   |
| Melanoma and other malignant neoplasms of skin                                                        | C43-C44   |
| Malignant neoplasms of mesothelial and soft tissue                                                    | C45-C49   |
| Malignant neoplasm of breast                                                                          | C50       |
| Malignant neoplasms of female genital organs                                                          | C51-C58   |
| Malignant neoplasms of male genital organs                                                            | C60-C63   |
| Malignant neoplasms of urinary tract                                                                  | C64-C68   |
| Malignant neoplasms of eye, brain and other parts of central nervous system                           | C69-72    |
| Malignant neoplasms of thyroid and other endocrine glands                                             | C73-C75   |
| Malignant neoplasms of ill-defined, secondary and unspecified sites                                   | C76-C80   |
| Malignant neoplasms, stated or presumed to be primary, of lymphoid, haematopoietic and related tissue | C81-C96   |

**Supplementary Table S2.** Chronic non-cancer pain covariates

| Chronic pain condition                                      | Diagnostic codes (ICD-9, ICD-10)                                                                                                                                                                                                                                                                                                                                                                                             | Definition (algorithm)                                                                                                                                                                                                                                                           |
|-------------------------------------------------------------|------------------------------------------------------------------------------------------------------------------------------------------------------------------------------------------------------------------------------------------------------------------------------------------------------------------------------------------------------------------------------------------------------------------------------|----------------------------------------------------------------------------------------------------------------------------------------------------------------------------------------------------------------------------------------------------------------------------------|
| <i>Nociceptive pain:</i>                                    |                                                                                                                                                                                                                                                                                                                                                                                                                              |                                                                                                                                                                                                                                                                                  |
| Mechanical neck and back problems (excluding low back pain) | <u>ICD-9:</u> 721.0, 721.1, 721.2, 721.3, 721.4, 721.5, 721.6, 721.7, 721.8, 721.9, 722.0, 722.1, 722.2, 722.3, 722.4, 722.5, 722.6, 722.7, 722.8, 722.9, 723.0, 723.1, 723.2, 723.3, 723.4, 723.5, 723.7, 723.8, 723.9, 737.1, 737.2, 738.2, 738.4, 738.5, 739.1, 739.2, 739.3, 739.4, 756.1, 846.0, 846.1, 846.2, 846.3, 846.8, 846.9, 847.0, 847.1, 847.2, 847.3, 847.9<br><u>ICD-10:</u> M47, M48.1, M48.2, M48.3, M48.9 | >=1 healthcare encounter with any of the ICD codes listed during previous 365 days<br>[Adapted from an algorithm created by Lavis et al, 1998, <sup>7</sup> and validated by Lacasse et al, 2015] <sup>8</sup>                                                                   |
| Low back pain, mechanical                                   | <u>ICD-9:</u> 724.0, 724.1, 724.2, 724.3, 724.5, 724.6, 724.8, 724.9,<br><u>ICD-10:</u> M43.2, M43.5, M48.0, M53.2, M53.8, M53.9, M54.5                                                                                                                                                                                                                                                                                      | >=1 healthcare encounter with any of the ICD codes listed during previous 365 days<br>[Adapted from an algorithm validated by Lacasse et al, 2015]                                                                                                                               |
| Osteoarthritis                                              | <u>ICD-9:</u> 715.00–715.99<br><u>ICD-10:</u> M15, M16, M17, M18, M19                                                                                                                                                                                                                                                                                                                                                        | >=1 hospital admission or >=3 physician visits with any of the ICD codes listed during previous 365 days<br>[Adaptation of an algorithm of Harrold et al, 2000, <sup>9</sup> who tested >=3 ambulatory visits]                                                                   |
| Rheumatoid arthritis                                        | <u>ICD-9:</u> 714<br><u>ICD-10:</u> M05-M06                                                                                                                                                                                                                                                                                                                                                                                  | >=1 hospital admission or >=3 physician visits with any of the ICD codes listed during previous 365 days<br>[Adaptation of algorithms of Widdifield et al, 2013, <sup>10</sup> who tested 1 hospitalization ever as one algorithm and >=3 physician visits as another algorithm] |
| <i>Neuropathic pain:</i>                                    |                                                                                                                                                                                                                                                                                                                                                                                                                              |                                                                                                                                                                                                                                                                                  |
| Diabetic neuropathy                                         | <u>ICD-9:</u> 250.6, 357.2<br><u>ICD-10:</u> E10.4, E11.4                                                                                                                                                                                                                                                                                                                                                                    | >=1 hospital admission or >=2 physician visits with any of the ICD codes listed during previous 365 days<br>[Cf. Dworkin et al, 2010; <sup>11</sup> Berger et al, 2003; <sup>12</sup> Kostev et al, 2014] <sup>13</sup>                                                          |
| Peripheral neuropathy (excluding diabetic neuropathy)       | <u>ICD-9:</u> 354.5, 356.0, 357.0, 357.1, 357.3, 357.4, 357.5, 357.6, 357.7, 357.8, 357.9<br><u>ICD-10:</u> G58.7, G60.0, G61.0, G61.9, G63, G62.0, G62.1, G62.2, G62.8                                                                                                                                                                                                                                                      | >=1 hospital admission or >=2 physician visits with any of the ICD codes listed during previous 365 days<br>[Adaptation of algorithm of Callaghan et al, 2015] <sup>14</sup>                                                                                                     |
| Lumbar radiculopathy                                        | <u>ICD-9:</u> 724.4<br><u>ICD-10:</u> M54.16                                                                                                                                                                                                                                                                                                                                                                                 | >=1 hospital admission or >=2 physician visits during previous 365 days<br>[Adapted from Schoenfeld et al, 2012] <sup>15</sup>                                                                                                                                                   |

**Supplementary Table S3.** Diagnostic codes for other covariates

| Description                 | Subcategory (if applicable)   | ICD codes                                        |
|-----------------------------|-------------------------------|--------------------------------------------------|
| Opioid use disorder         |                               | ICD-9: 304.0<br>ICD-10: F11                      |
| Alcohol dependence or abuse |                               | ICD-9: 303<br>ICD-10: F10.1, F10.2               |
| Psychiatric illness         | Depression                    | ICD-9: 311, 296.2, 296.3<br>ICD-10: F32, F33     |
|                             | Bipolar disorder/ mixed mania | ICD-9: 296.0, 296.1, 296.4, 296.9<br>ICD-10: F31 |
|                             | Schizophrenia                 | ICD-9: 295<br>ICD-10: F20                        |
|                             | Personality disorders         | ICD-9: 301<br>ICD-10: F60                        |
|                             | Other psychosis               | ICD-9: 297 - 299<br>ICD-10: F21 – F29            |

## **Description of statistical analyses with additional detail**

We estimated changes in monthly opioid analgesic medication use following the introduction of the standards and guidelines as absolute differences, using a generalized linear model with an identity link function and a normal error distribution. We estimated changes in discontinuation, switching or initiation as odds ratios, using generalized linear models with a logistic link function and a binomial error distribution.

Each statistical model included data for patients in the policy cohort and patients in the historical control cohort. We estimated absolute differences or odds ratios for changes to the level and trend of each outcome following the opioid prescribing standards and guidelines among patients in the policy cohort compared to the historical control cohort by including interactions in each model between cohort status (policy cohort vs historical control cohort) with level effect and trend effect variables. Each model included a binary cohort status variable to associate each observation of an individual with the appropriate cohort, which could differ for different observations of the same individual (if the individual entered both cohorts). In addition, models included a binary level effect variable to indicate the post-policy period, and a linear trend effect variable which incremented by one during the post-policy period; the same values were assigned to analogous periods for the historical control cohort. An interaction between cohort status and level effect in the model tested for level changes in drug utilization, which represented a sudden change following the policy. An interaction between cohort status and trend effect in the model tested for trend (slope) changes, which represented a gradual change in drug utilization occurring in each month of the post-policy period. (Figure S1 in the depicts potential level and trend changes following a change in policy.) We modified our approach for the outcome of monthly opioid use by

including a 3-month transition period and using a shorter post-policy period, because days' supply from prescriptions pre-dating the opioid prescribing standards and guidelines might carry forward for approximately 3 months and attenuate this measure.

**Supplementary Figure S1.** Potential changes in prescription drug utilization following a change in drug policy

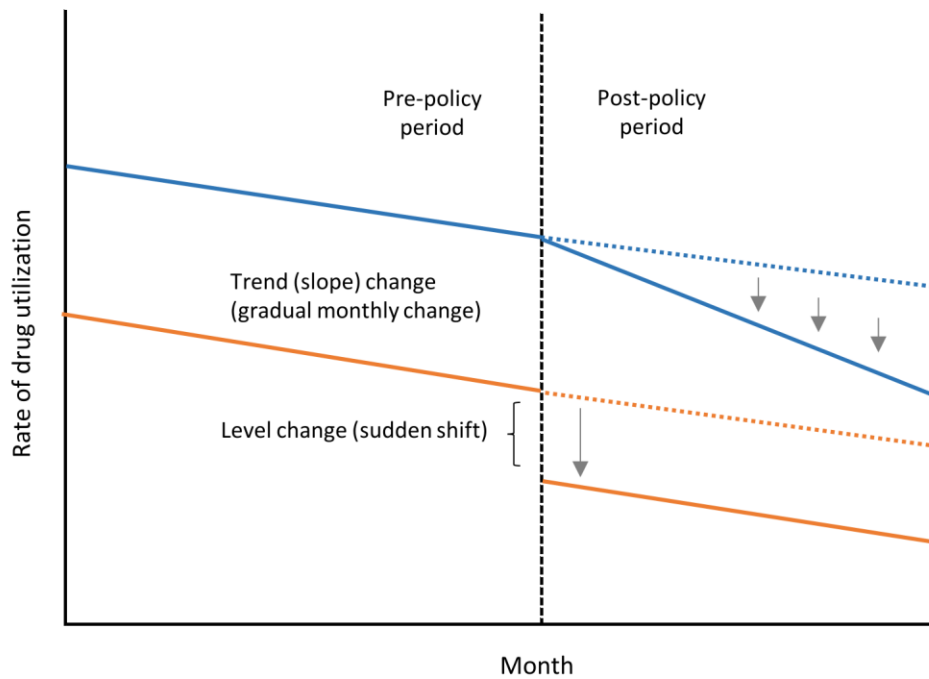

## Analyses of concurrent use of opioids and sedative/hypnotic medications

**Supplementary Figure S2.** Monthly rates of initiation and stopping of concurrent use of opioids and sedative/hypnotic medications, in the policy cohort (PC) vs historical control cohort (HCC).

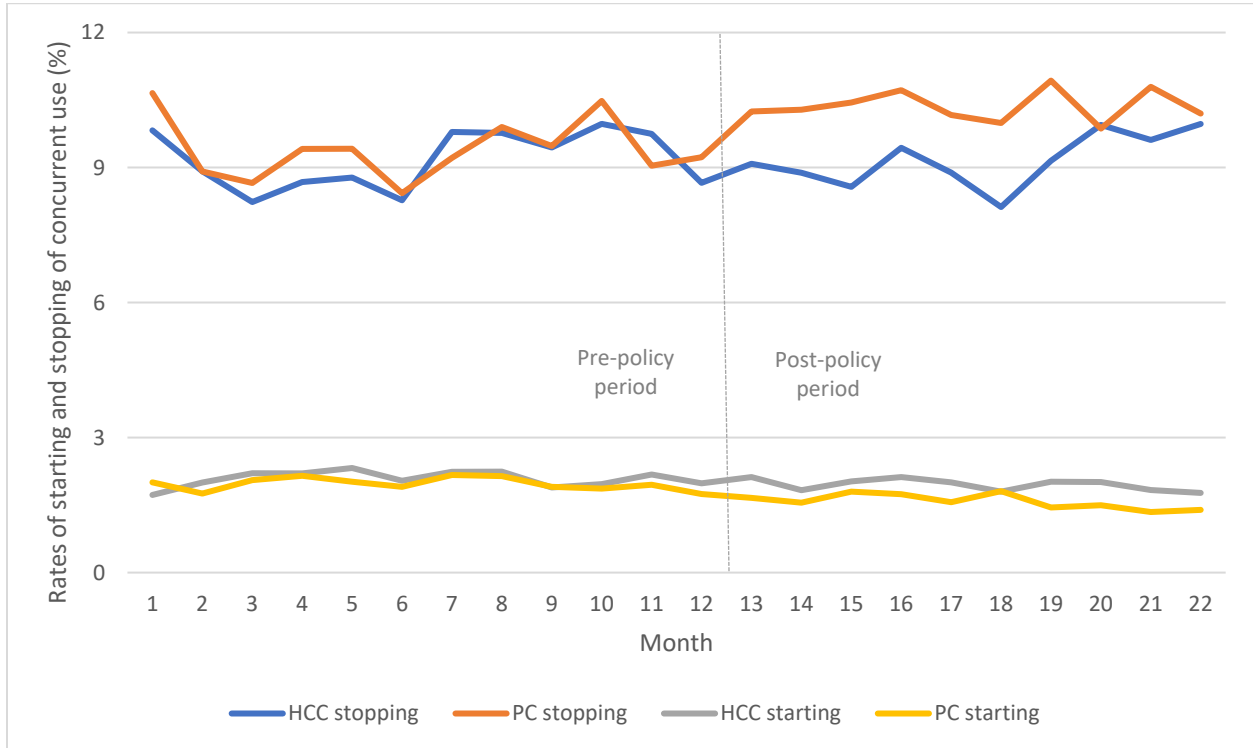

Supplement: 2019-0003-1-at.pdf [file 2019-0003-1-at.pdf]
